# Supplementary material for: Foeniculum vulgare Miller, a New Chemotype from Montenegro
Source: MDPI journal article supplement (doi:10.3390/plants11010042), 2021-12-23
Supplement: s1 [file s1]

## Supplementary Materials

### ***Foeniculum vulgare* Miller, a new chemotype from Montenegro**

**Mijat Božović<sup>1,✉</sup>, Stefania Garzoli<sup>2,✉</sup>, Svetlana Vujović<sup>3</sup>, Filippo Sapienza<sup>2</sup>, Rino Ragno<sup>2</sup>**

#### **Affiliation**

<sup>1</sup> Faculty of Natural Sciences and Mathematics, University of Montenegro, Podgorica, Montenegro

<sup>2</sup> Department of Drug Chemistry and Technology, Sapienza University, Rome, Italy

<sup>3</sup> Institute for Medicines and Medical Devices in Montenegro, Podgorica, Montenegro

#### **Correspondence**

***Dr. Mijat Božović***

Faculty of Natural Sciences and Mathematics

University of Montenegro

Podgorica, Montenegro

Tel.: +382-20-243-816

Fax: +382-20-244-608

mijatboz@ucg.ac.me

***Dr. Rino Ragno***

Department of Drug Chemistry and Technology

Sapienza University

Rome, Italy

Tel.: +39-6-4991-3937

Fax: +39-6-4991-3627

rino.ragno@uniroma1.it

¥ Contributed equally to the paper

## Contents:

**Figure S1:** Trend of major compounds for F1-F4 samples.

**Figure S2:** Trend of major compounds for F5-F8 samples.

**Figure S3:** Trend of major compounds for F9-F12 samples.

**Figure S4:** Trend of the low-boiling compounds for F1-F4 samples.

**Figure S5:** Trend of the low-boiling compounds for F5-F8 samples.

**Figure S6:** Trend of the low-boiling compounds for F9-F12 samples.

**Figure S7:** Doclea, Podgorica; natural habitat of *Foeniculum vulgare* Miller (FV) (photo by Svetlana Vujović).

**Figure S8:** Uzdomir, Nikšić; natural habitat of FV (photo by Svetlana Vujović).

**Figure S9:** St. John's Fortress, Kotor; natural habitat of FV (photo by Svetlana Vujović).

**Table S1:** Yield % of FV from Montenegro.

**Table S2:** Most characterizing components of FV essential oils (FVEOs) from Montenegro: chemical structures, MWs and CAS numbers.

**Table S3:** Chemical composition (%) of various FVEOs as listed in the <http://eo.3d-qsar.com> site.

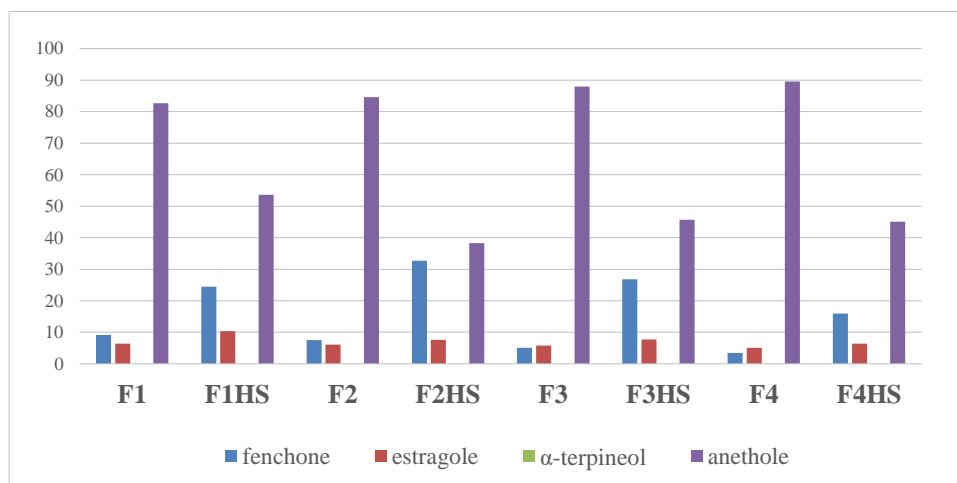

**Figure S1:** Trend of major compounds for F1-F4 samples.

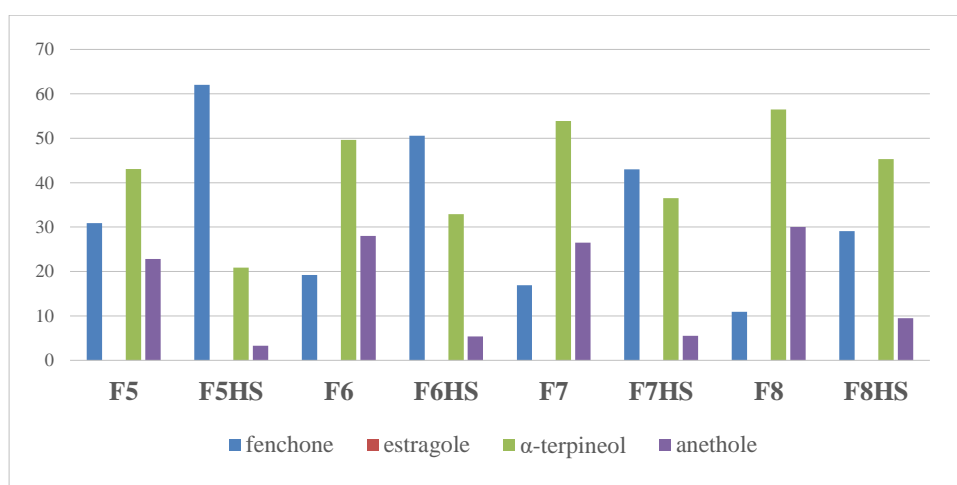

**Figure S2:** Trend of major compounds for F5-F8 samples.

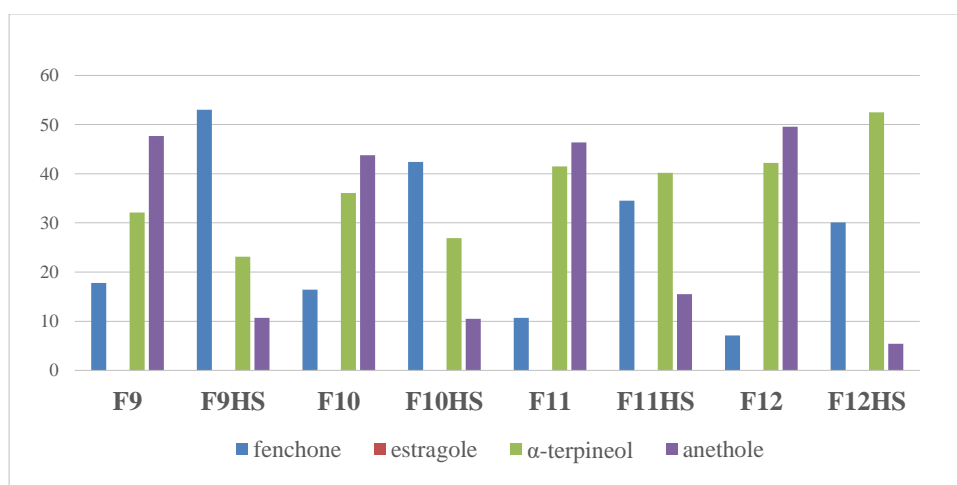

**Figure S3:** Trend of major compounds for F9-F12 samples.

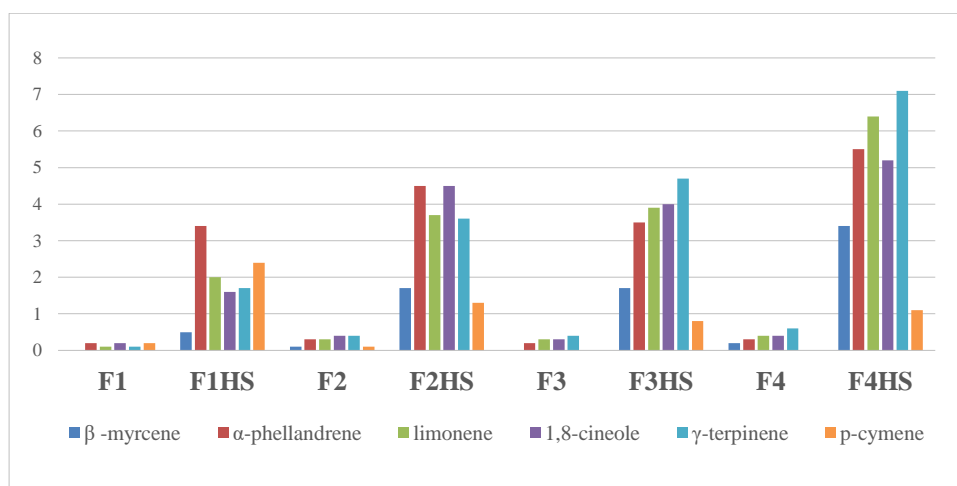

**Figure S4:** Trend of the low-boiling compounds for F1-F4 samples.

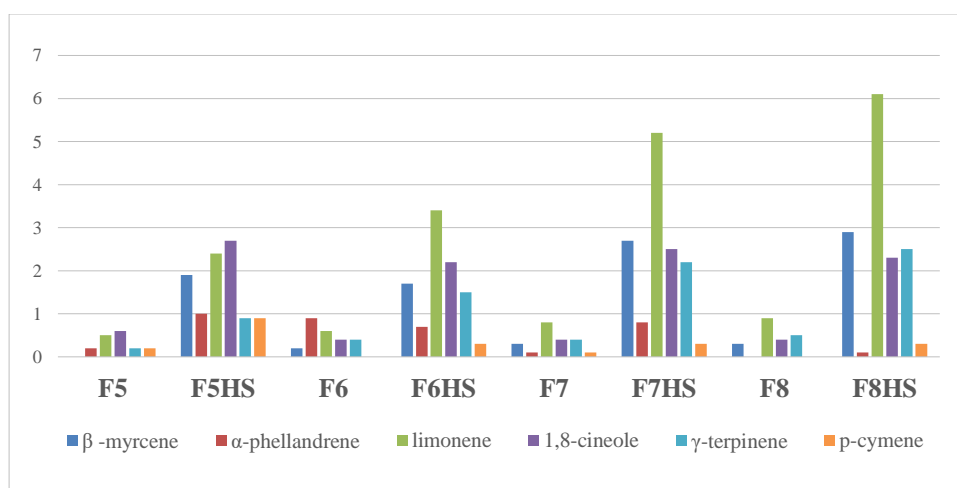

**Figure S5:** Trend of the low-boiling compounds for F5-F8 samples.

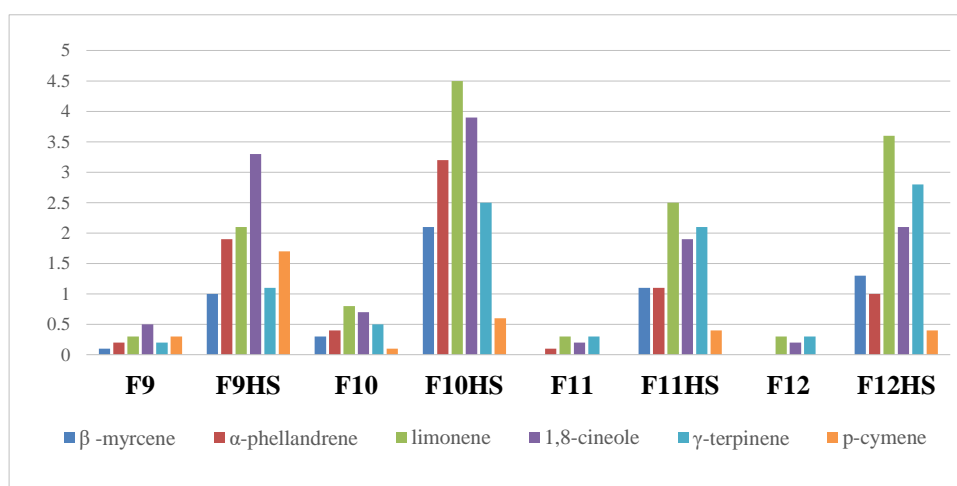

**Figure S6:** Trend of the low-boiling compounds for F9-F12 samples.

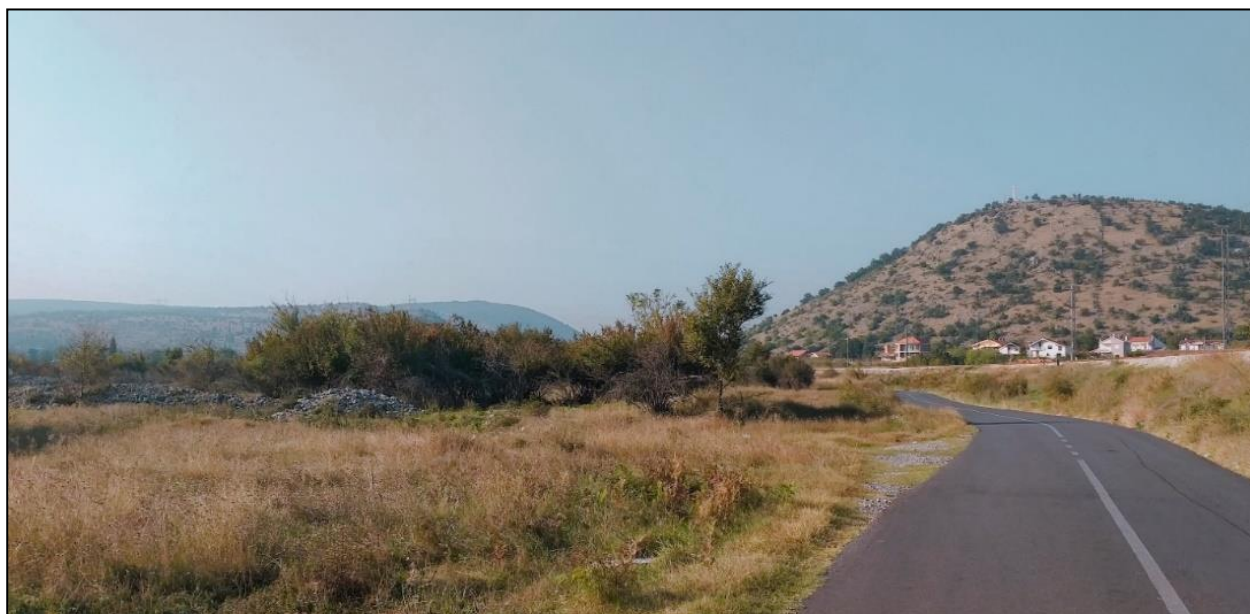

**Figure S7:** Doclea, Podgorica; natural habitat of *Foeniculum vulgare* Miller (FV) (photo by Svetlana Vujović).

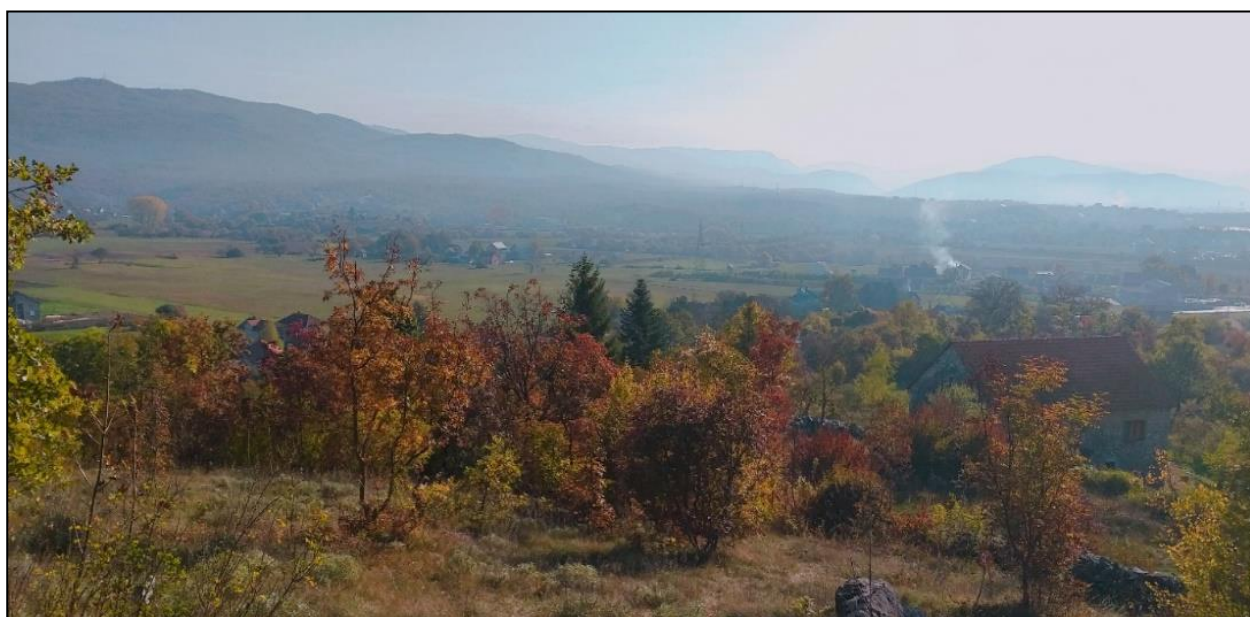

**Figure S8:** Uzdomir, Nikšić; natural habitat of FV (photo by Svetlana Vujović).

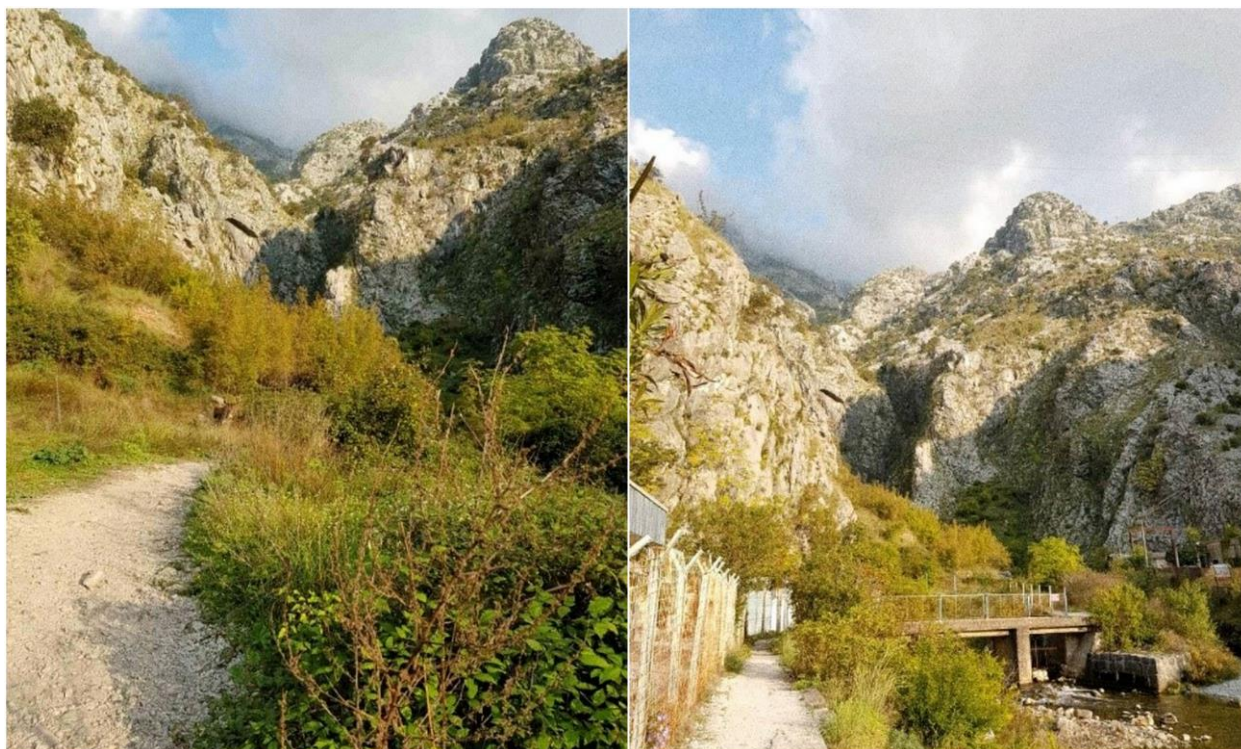

**Figure S9:** St. John's Fortress, Kotor; natural habitat of FV (photo by Svetlana Vujović).

**Table S1:** Yield % of FV from Montenegro.

| locality  | extraction time |                 |                |                |                 |                |                |                 |                |                |                 |                |
|-----------|-----------------|-----------------|----------------|----------------|-----------------|----------------|----------------|-----------------|----------------|----------------|-----------------|----------------|
|           | 1h              |                 |                | 2h             |                 |                | 3h             |                 |                | 6h             |                 |                |
|           | y <sup>a</sup>  | cy <sup>b</sup> | s <sup>c</sup> | y <sup>a</sup> | cy <sup>b</sup> | s <sup>c</sup> | y <sup>a</sup> | cy <sup>b</sup> | s <sup>c</sup> | y <sup>a</sup> | cy <sup>b</sup> | s <sup>c</sup> |
| Podgorica | 0.92            | 0.92            | 31.72          | 0.82           | 1.74            | 28.27          | 0.5            | 2.24            | 17.24          | 0.66           | 2.9             | 22.76          |
| Nikšić    | 1.88            | 1.88            | 64.38          | 0.44           | 2.32            | 15.06          | 0.32           | 2.64            | 10.95          | 0.28           | 2.92            | 9.44           |
| Kotor     | 1.15            | 1.15            | 49.35          | 0.74           | 1.86            | 32.61          | 0.22           | 2.11            | 9.44           | 0.22           | 2.33            | 9.59           |

<sup>a</sup> Yield % calculated on the dried FV plant material. <sup>b</sup> Cumulative yield % of FVEOs over time. <sup>c</sup> Shared % of the total yield.



**Table S2:** Most characterizing components of FV essential oils (FVEOs) from Montenegro: chemical structures, MWs and CAS numbers.

| # <sup>1</sup> | Chemical Structure                                                                | Name                | MW     | CAS       |
|----------------|-----------------------------------------------------------------------------------|---------------------|--------|-----------|
| 12             | 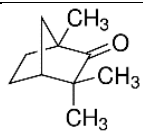 | fenchone            | 152.23 | 7787-20-4 |
| 16             |  | estragole           | 148.20 | 140-67-0  |
| 17             |  | $\alpha$ -terpineol | 154.25 | 98-55-5   |
| 18             |  | anethole            | 148.20 | 4180-23-8 |

<sup>1</sup> # indicates the compound identification number.

**Table S3:** Chemical composition (%) of various FVEOs as listed in the <http://eo.3d-qsar.com> site. Components displaying an average composition lower than 2 were omitted.

| DOI                           | Extraction Type    | Extraction Yield | Extraction Time | Plant Part | Plant State | Country  | alpha-pinene | pha-phellandren | camphor | limonene | Fenchone | Estragole | anethole |
|-------------------------------|--------------------|------------------|-----------------|------------|-------------|----------|--------------|-----------------|---------|----------|----------|-----------|----------|
| 10.1080/03235408.2013.853456  | Hydro Distillation | 3.5              | NA              | Seeds      | Dry         | Iran     | 0.0          | 2.7             | 0.0     | 0.0      | 9.4      | 3.5       | 75.2     |
| 10.2478/pjct-2019-0018        | Hydro Distillation | 4.18             | 2.0h            | Fruits     | Fresh       | Poland   | 2.9          | 0.0             | 0.3     | 2.3      | 18.1     | 2.6       | 70.0     |
| 10.1016/j.bjp.2015.02.009     | Hydro Distillation | NA               | 3.0h            | Leaves     | Fresh       | Brazil   | 1.5          | 0.0             | 0.0     | 21.3     | 1.2      | 1.8       | 70.2     |
| Progetto_OE_Commerciali       | Commercial         | NA               | NA              | NA         | NA          | NA       | 1.0          | 0.0             | 0.0     | 3.4      | 3.4      | 2.2       | 78.1     |
| 10.1016/j.biopha.2016.10.013  | NA                 | NA               | NA              | NA         | NA          | NA       | 5.6          | 3.7             | 0.3     | 6.3      | 5.2      | 8.1       | 56.3     |
| 10.1080/14786419.2017.1292266 | Hydro Distillation | 2.2              | 3.0h            | Areal Part | Fresh       | Portugal | 10.1         | 11.0            | 0.1     | 3.6      | 10.8     | 4.0       | 47.0     |
| 10.1080/10412905.2015.1025919 | Steam Distillation | NA               | NA              | Seeds      | NA          | NA       | 4.7          | 1.0             | 0.0     | 4.0      | 14.3     | 2.1       | 71.3     |
| 10.1007/s10340-016-0759-2     | Hydro Distillation | NA               | 4.0h            | Fruits     | Fresh       | Poland   | 2.8          | 0.0             | 0.6     | 2.1      | 33.4     | 0.0       | 39.2     |
| 10.1371/journal.pone.0165667  | Hydro Distillation | NA               | 4.0h            | Seeds      | Dry         | NA       | 1.1          | 0.0             | 0.0     | 10.5     | 4.6      | 80.8      | 1.0      |
| 10.3390/molecules23071549     | Commercial         | NA               | NA              | NA         | NA          | NA       | 3.6          | 0.5             | 0.1     | 11.5     | 6.5      | 0.6       | 75.1     |
| 10.1007/s11274-011-0939-4     | Hydro Distillation | NA               | NA              | NA         | Dry         | NA       | 0.0          | 0.0             | 0.4     | 1.6      | 0.0      | 0.0       | 88.9     |
| 10.1016/j.indcrop.2012.10.012 | Hydro Distillation | 1.95             | 6.0h            | Seeds      | Dry         | Egypt    | 1.6          | 0.0             | 0.0     | 4.2      | 8.3      | 10.4      | 56.4     |
| 10.1016/j.indcrop.2019.111854 | Hydro Distillation | 3.6              | 3.0h            | Fruits     | Dry         | Serbia   | 0.5          | 0.2             | 0.5     | 1.1      | 22.6     | 2.7       | 69.9     |
| 10.1016/j.indcrop.2019.111854 | Hydro Distillation | 4                | 3.0h            | Fruits     | Dry         | Serbia   | 2.0          | 0.4             | 0.5     | 2.3      | 23.1     | 2.6       | 64.9     |
| 10.24193/subbchem.2019.2.11   | Hydro Distillation | 1.7              | 4.0h            | Seeds      | Dry         | Romania  | 0.0          | 0.0             | 0.0     | 7.3      | 1.3      | 1.3       | 89.6     |
| 10.1080/10412905.2016.1146169 | Hydro Distillation | NA               | 2.0h            | Seeds      | Dry         | Iran     | 3.6          | 0.1             | 0.0     | 20.6     | 7.2      | 57.9      | 5.0      |
| 10.1016/j.indcrop.2016.02.064 | Hydro Distillation | NA               | 3.0h            | Fruits     | Dry         | Romania  | 0.0          | 0.0             | 21.3    | 0.0      | 0.5      | 0.6       | 58.1     |
| 10.3109/09637486.2014.953454  | Commercial         | NA               | NA              | Areal Part | Flowering   | Scotland | 1.7          | 1.1             | 0.0     | 2.8      | 7.1      | 8.1       | 58.7     |
